# Supplementary material for: A new and efficient enantioselective synthesis of both enantiomers of the calcium channel blocker bepridil
Source: Royal Society of Chemistry journal article supplement (doi:10.1039/c6nj02928k), 2016-12-17
Supplement: c6nj02928k1.pdf [file c6nj02928k1.pdf]

## Supplementary Material

### A new and efficient enantioselective synthesis of both enantiomers of calcium channel blocker Bepridil

Mohammad Mujahid,<sup>a,b</sup> Jambu Subramanian,<sup>a</sup> Viswanadh Nalla,<sup>a</sup> Murugesan Sasikumar,<sup>c</sup> Sunita Sharad Kunte,<sup>a</sup> Murugan Muthukrishnan<sup>\*a</sup>

<sup>a</sup>Division of Organic Chemistry, CSIR-National Chemical Laboratory, Pune- 411 008, India

*\*Corresponding author. Tel.: +91 20 25902284; fax: +91 2025902629;*

*E-mail: [m.muthukrishnan@ncl.res.in](mailto:m.muthukrishnan@ncl.res.in) (M. Muthukrishnan)*

<sup>b</sup>P.G. Department of Chemistry, Shri Shivaji College of Arts, Commerce & Science, Akola-444001, India.

<sup>c</sup>Department of Chemistry, School of Basic Science, Vels University, Chennai-600117, India

|    | <u>Table of contents</u>                                         | <u>Pages</u> |
|----|------------------------------------------------------------------|--------------|
| 1  | <b><sup>1</sup>H &amp; <sup>13</sup>C NMR of Compound (S)-3a</b> | <b>S2</b>    |
| 2  | <b>HRMS of Compound (S)-3a</b>                                   | <b>S3</b>    |
| 3  | <b><sup>1</sup>H &amp; <sup>13</sup>C NMR of Compound (R)-3b</b> | <b>S4</b>    |
| 4  | <b><sup>1</sup>H &amp; <sup>13</sup>C NMR of Compound (S)-4</b>  | <b>S5</b>    |
| 5  | <b>Chiral HPLC analysis of Compound (S)-4</b>                    | <b>S6</b>    |
| 6  | <b><sup>1</sup>H &amp; <sup>13</sup>C NMR of Compound (S)-5</b>  | <b>S7</b>    |
| 7  | <b><sup>1</sup>H &amp; <sup>13</sup>C NMR of Compound (R)-6</b>  | <b>S8</b>    |
| 8  | <b><sup>1</sup>H &amp; <sup>13</sup>C NMR of Compound 7</b>      | <b>S9</b>    |
| 9  | <b><sup>1</sup>H &amp; <sup>13</sup>C NMR of Compound (S)-11</b> | <b>S10</b>   |
| 10 | <b>HRMS of compound (S)-11</b>                                   | <b>S11</b>   |
| 11 | <b><sup>1</sup>H &amp; <sup>13</sup>C NMR of Compound (R)-12</b> | <b>S12</b>   |
| 12 | <b>HRMS of compound (R)-12</b>                                   | <b>S13</b>   |
| 13 | <b><sup>1</sup>H &amp; <sup>13</sup>C NMR of bepridil (R)-1</b>  | <b>S14</b>   |
| 14 | <b>HRMS of compound (R)-1</b>                                    | <b>S15</b>   |
| 15 | <b>Chiral HPLC analysis of compound (R)-1</b>                    | <b>S16</b>   |
| 16 | <b>Chiral HPLC analysis of compound (S)-1</b>                    | <b>S17</b>   |

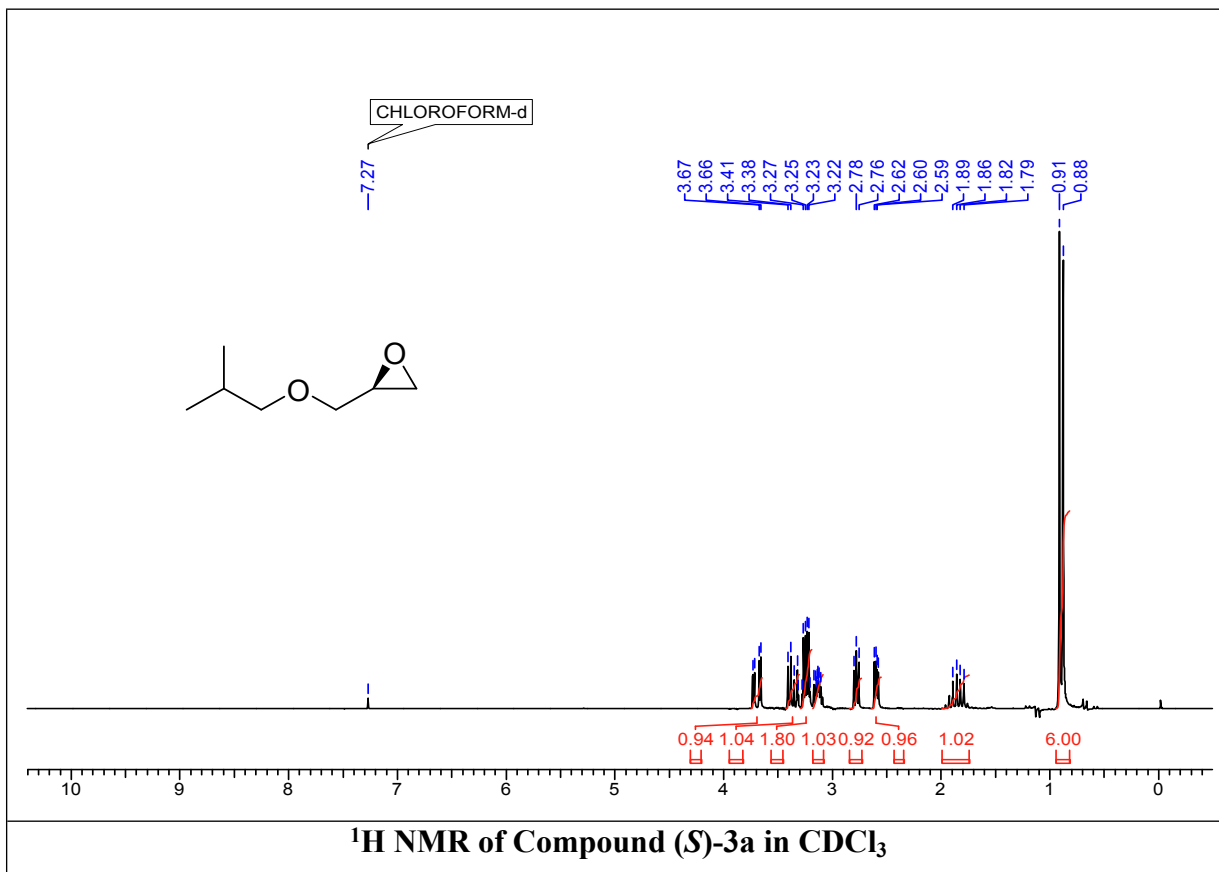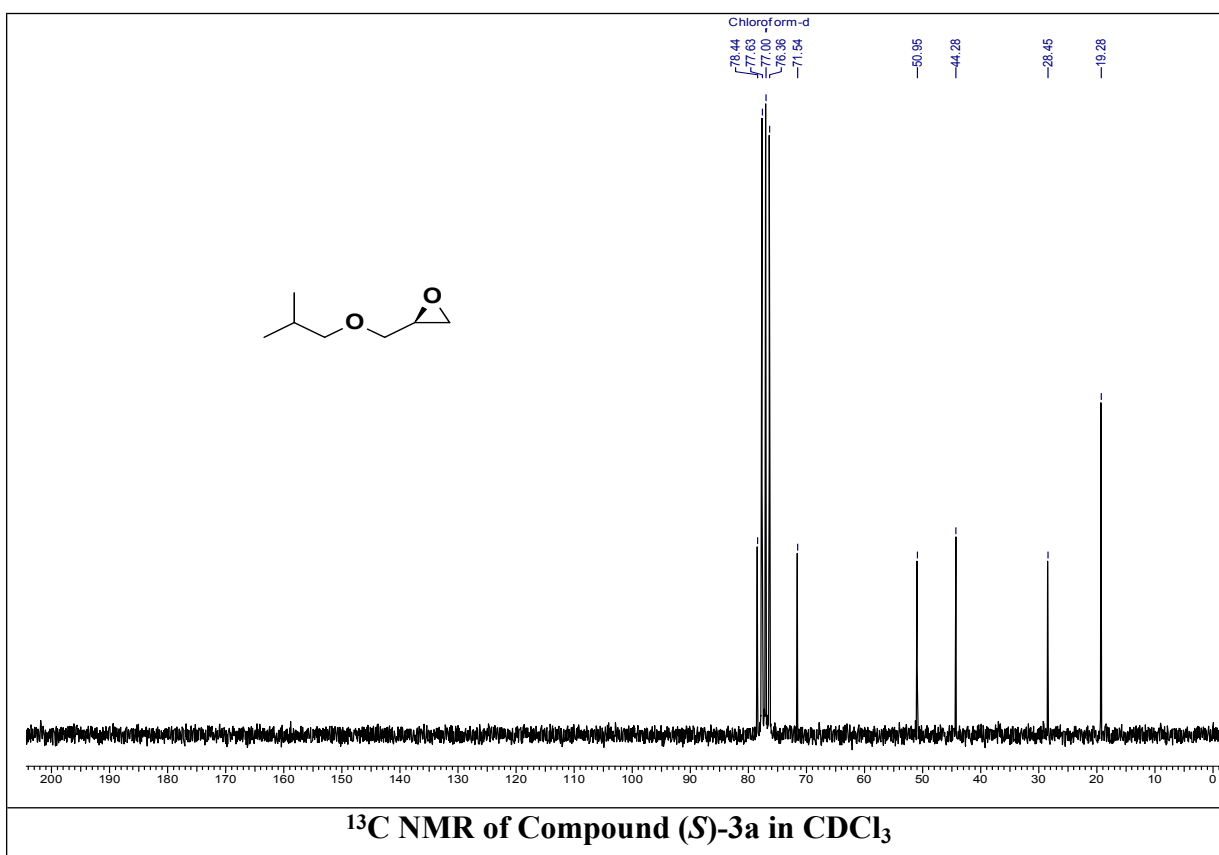

# HRMS of Compound (S)-3a

SJ-150 #127 RT: 0.56 AV: 1 NL: 1.29E6  
T: FTMS + p ESIFull ms [100.00-1500.00]

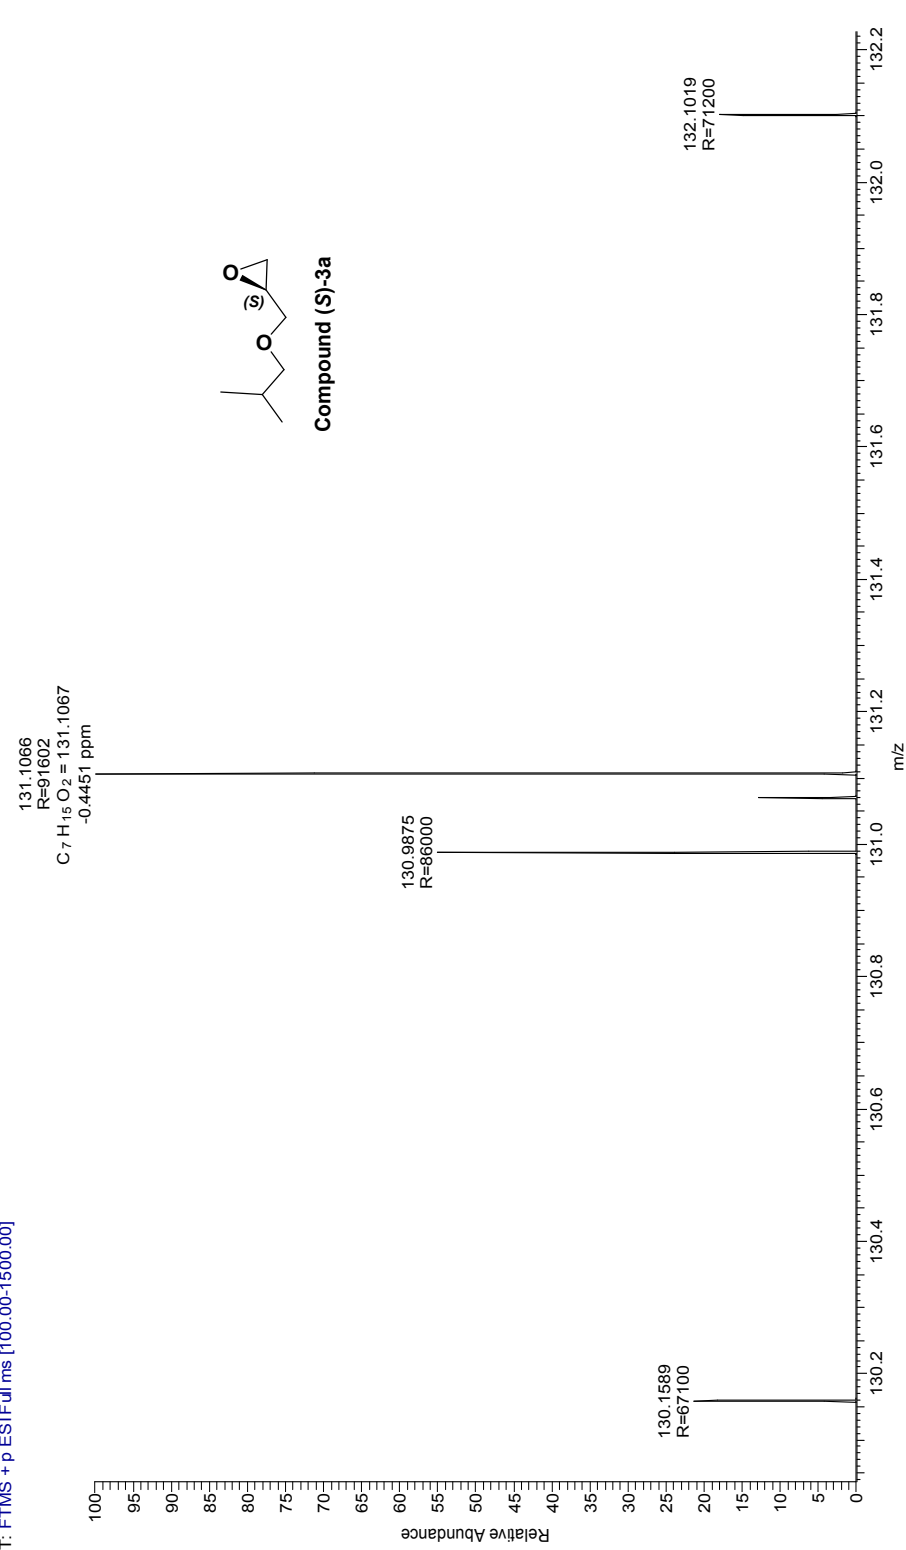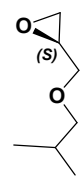

Compound (S)-3a

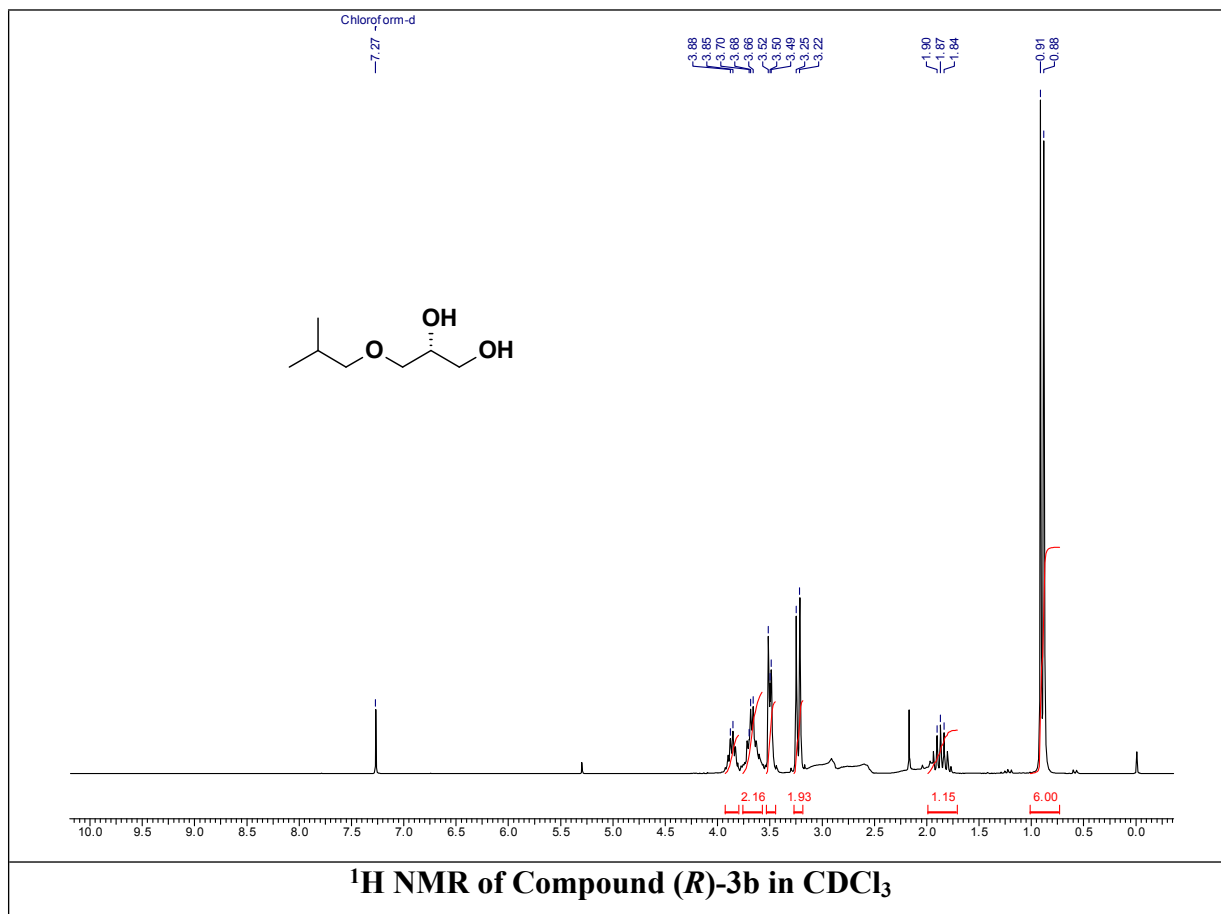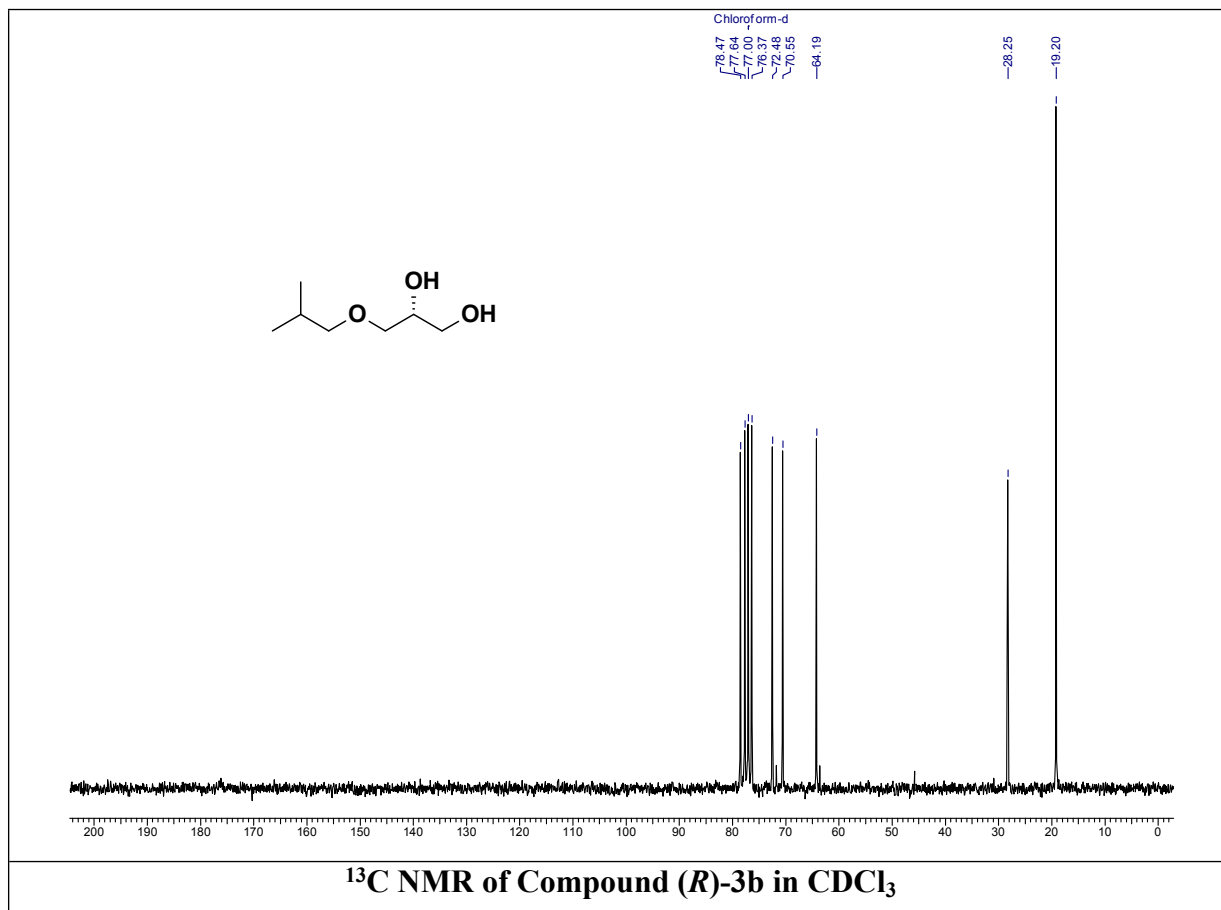

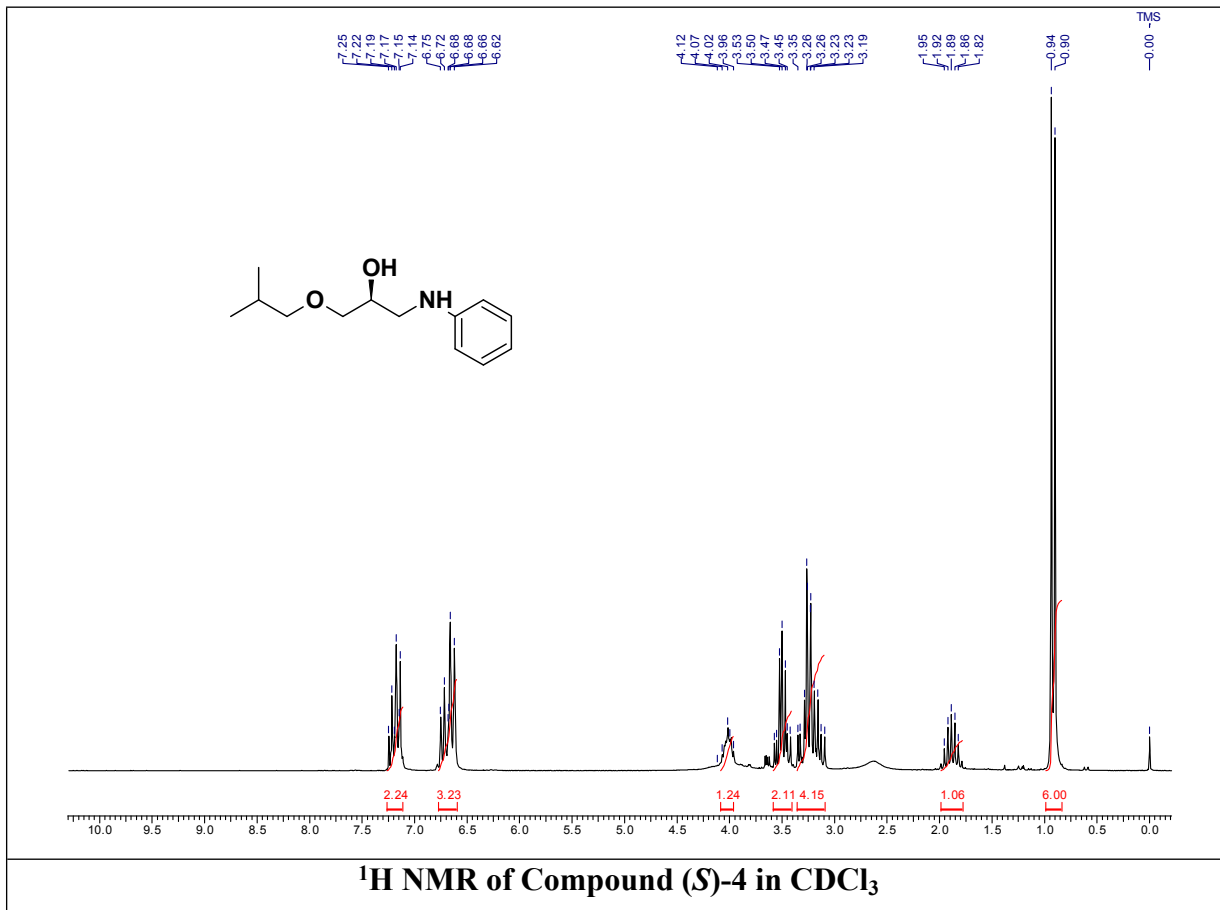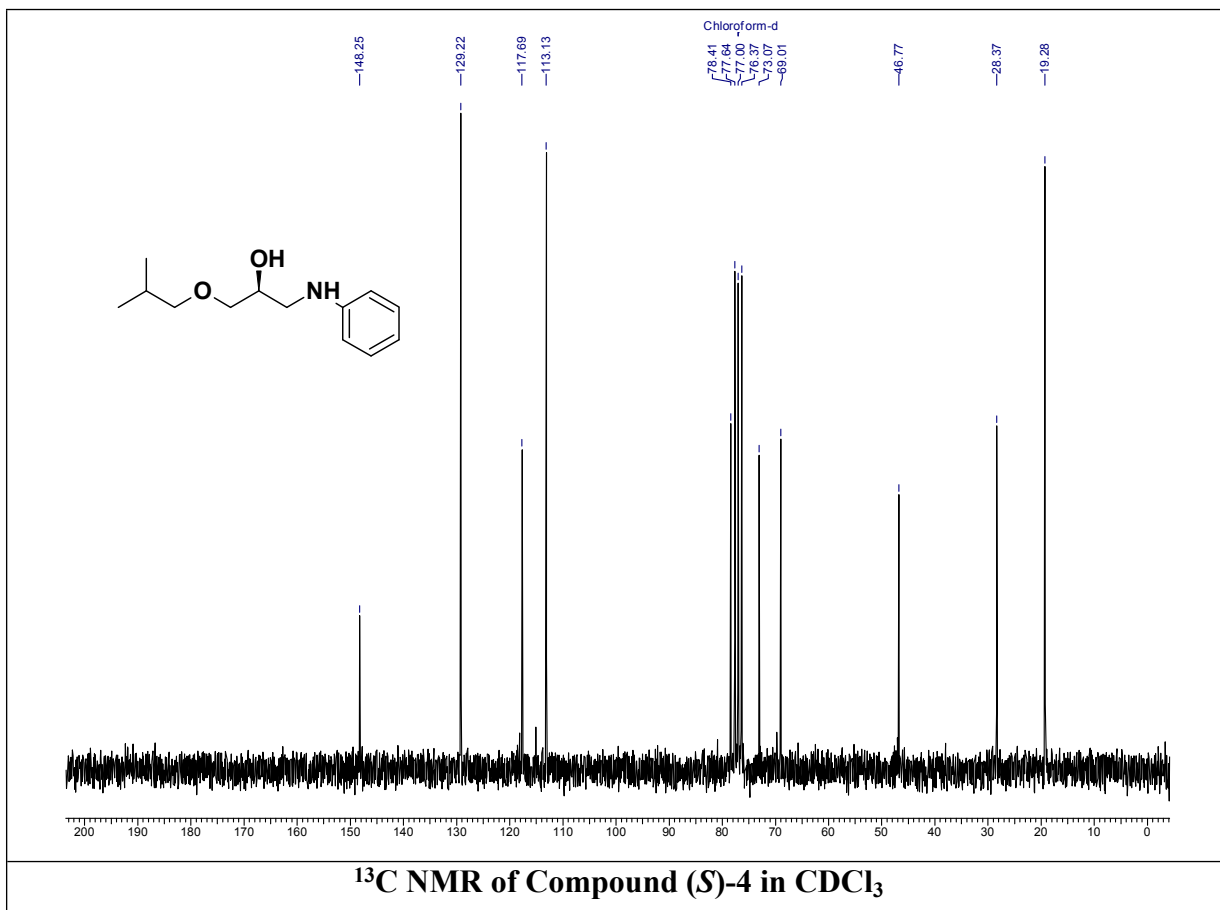

## Chiral HPLC Analysis of Compound (S)-4

Conditions: Chiralcel OD-H (250 X 4.6 mm) column; eluent: Ethanol/Petether/TFA (15:85:0.1); flow rate: 0.5 mL/min; detector 254 nm.

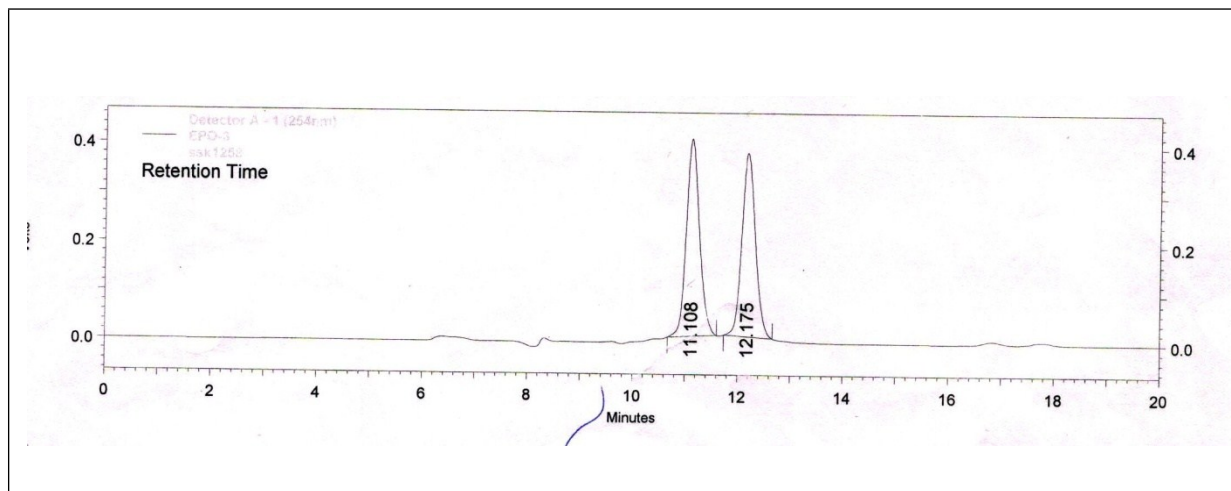

### Racemic Sample Chromatograph

| Pk #          | Retention Time (mins) | Area            | Area %         |
|---------------|-----------------------|-----------------|----------------|
| 1             | 11.108                | 7022608         | 50.793         |
| 2             | 12.175                | 683422          | 49.207         |
| <b>Totals</b> |                       | <b>13826030</b> | <b>100.000</b> |

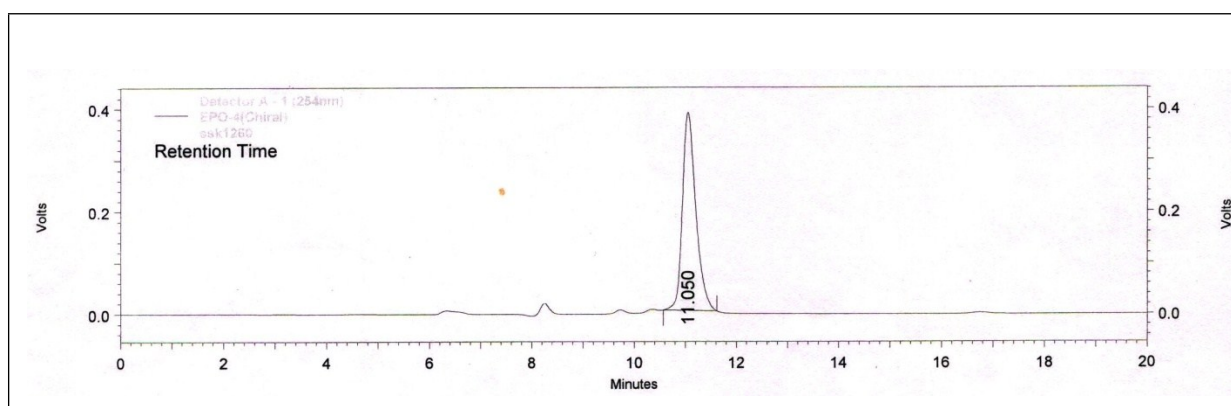

### Chiral Sample Chromatograph

| Pk #          | Retention Time (mins) | Area           | Area %         |
|---------------|-----------------------|----------------|----------------|
| 1             | 11.050                | 7040195        | 100.000        |
| <b>Totals</b> |                       | <b>7040195</b> | <b>100.000</b> |

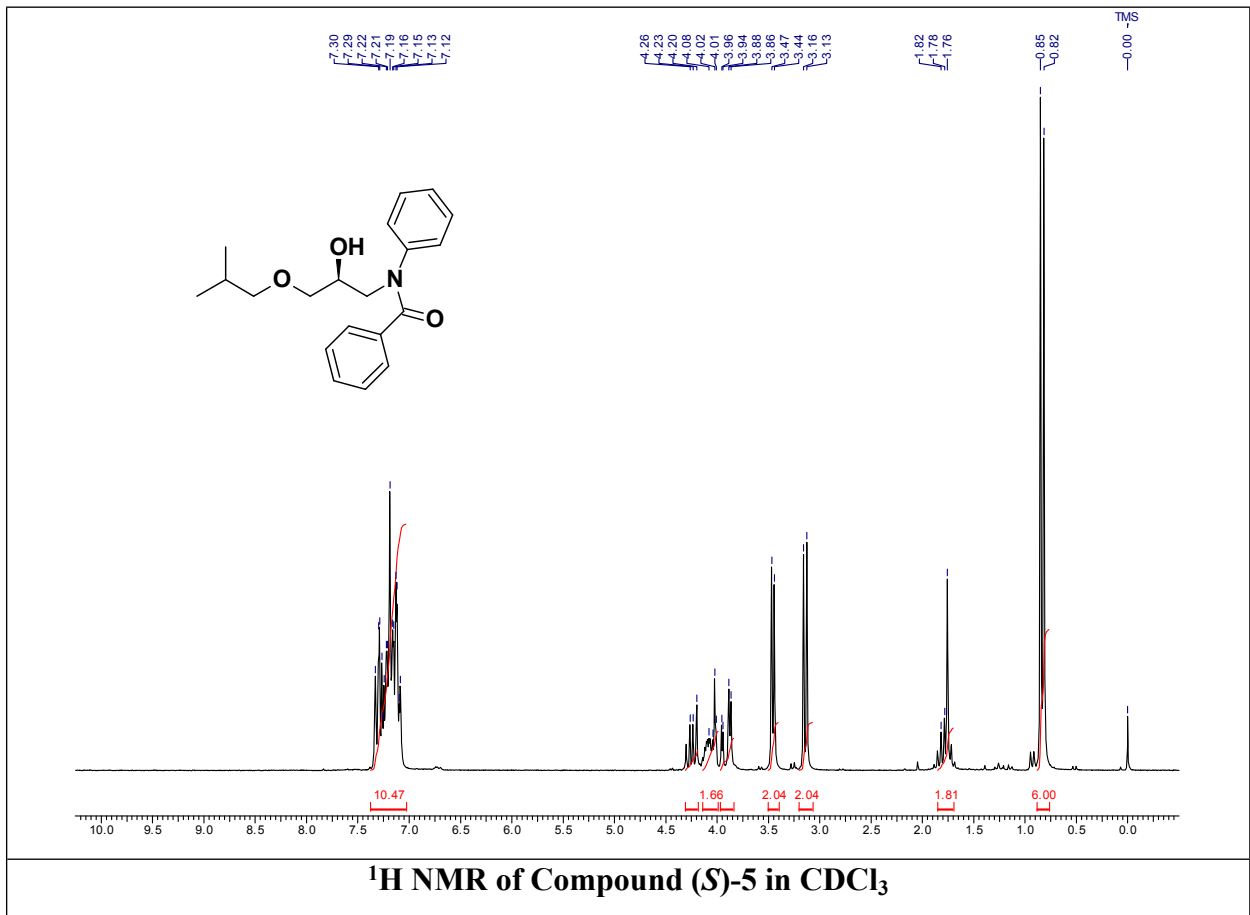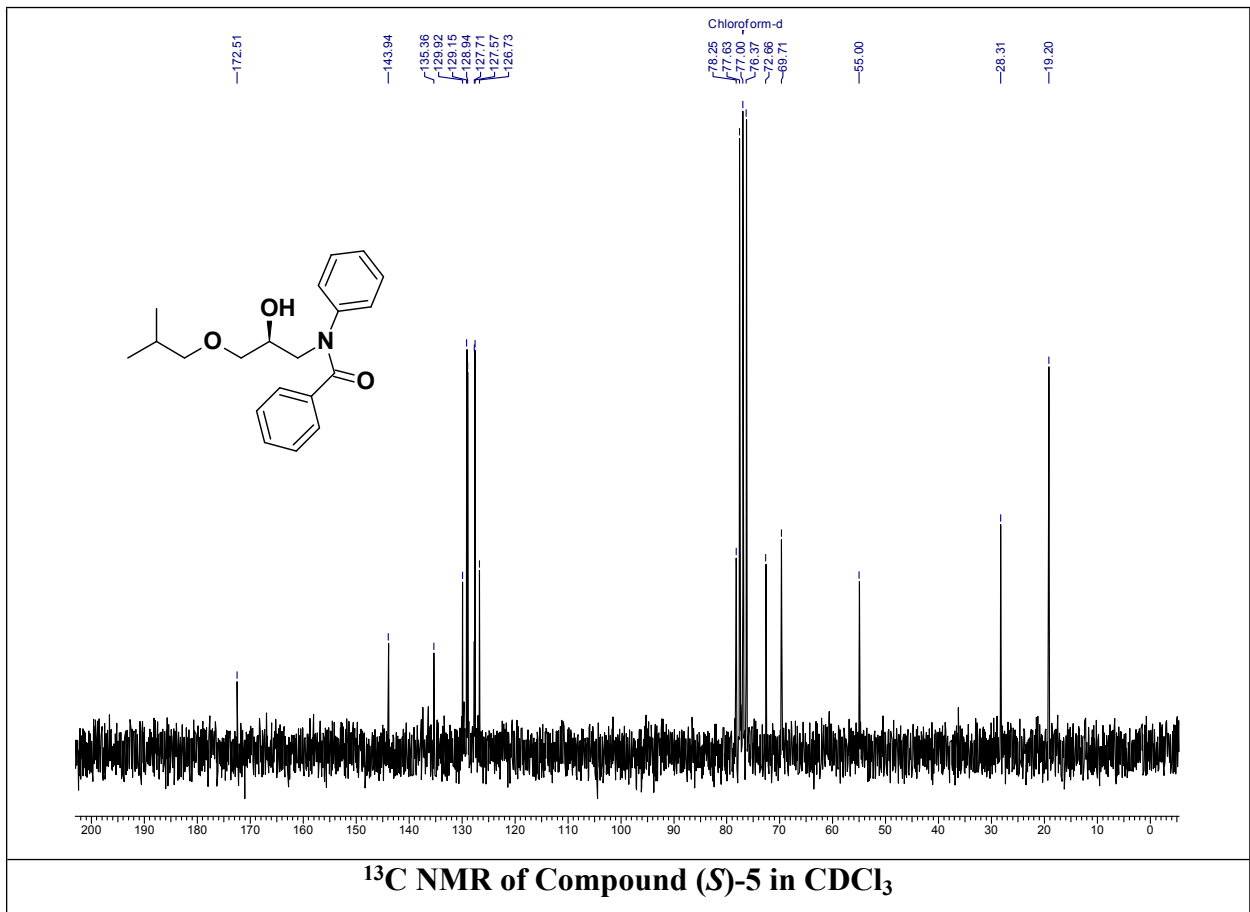

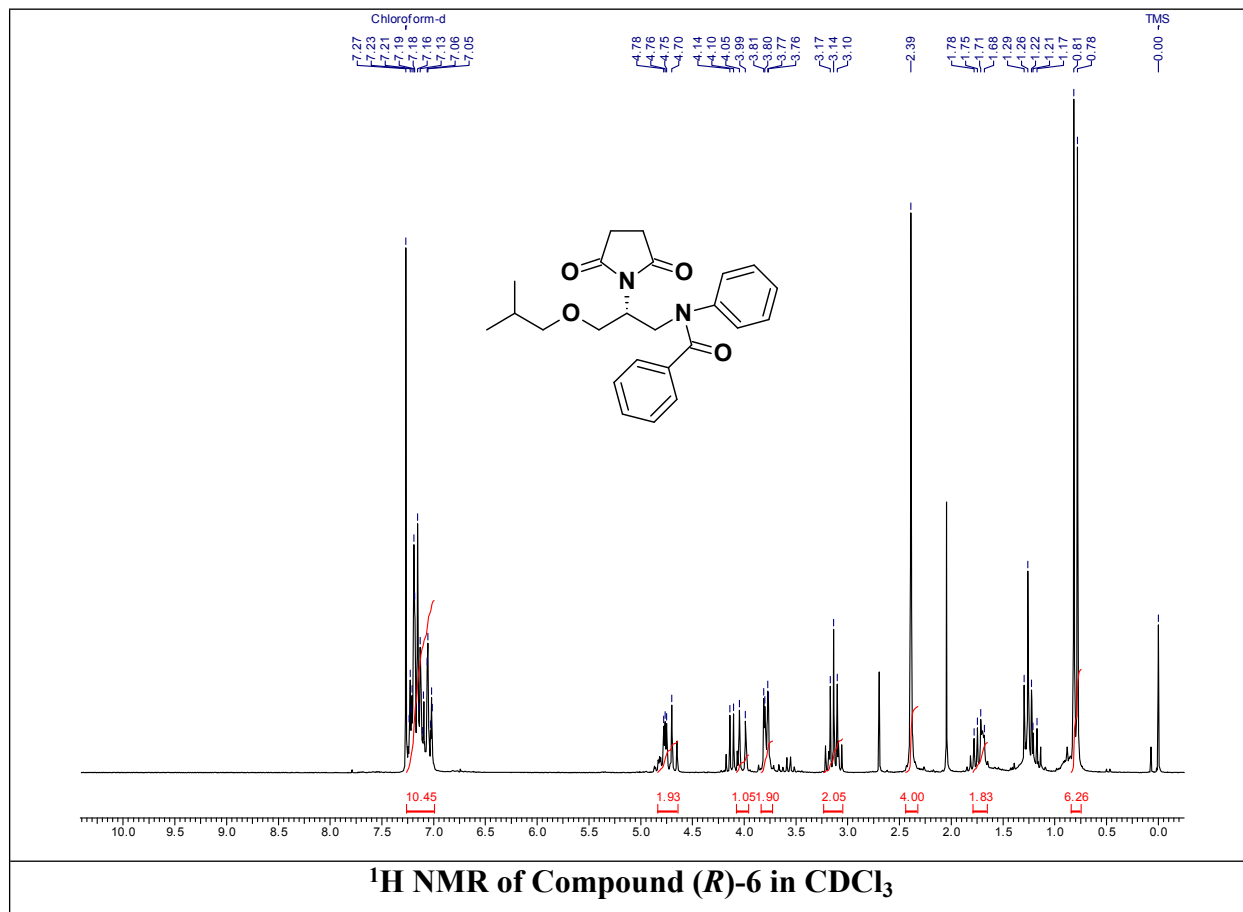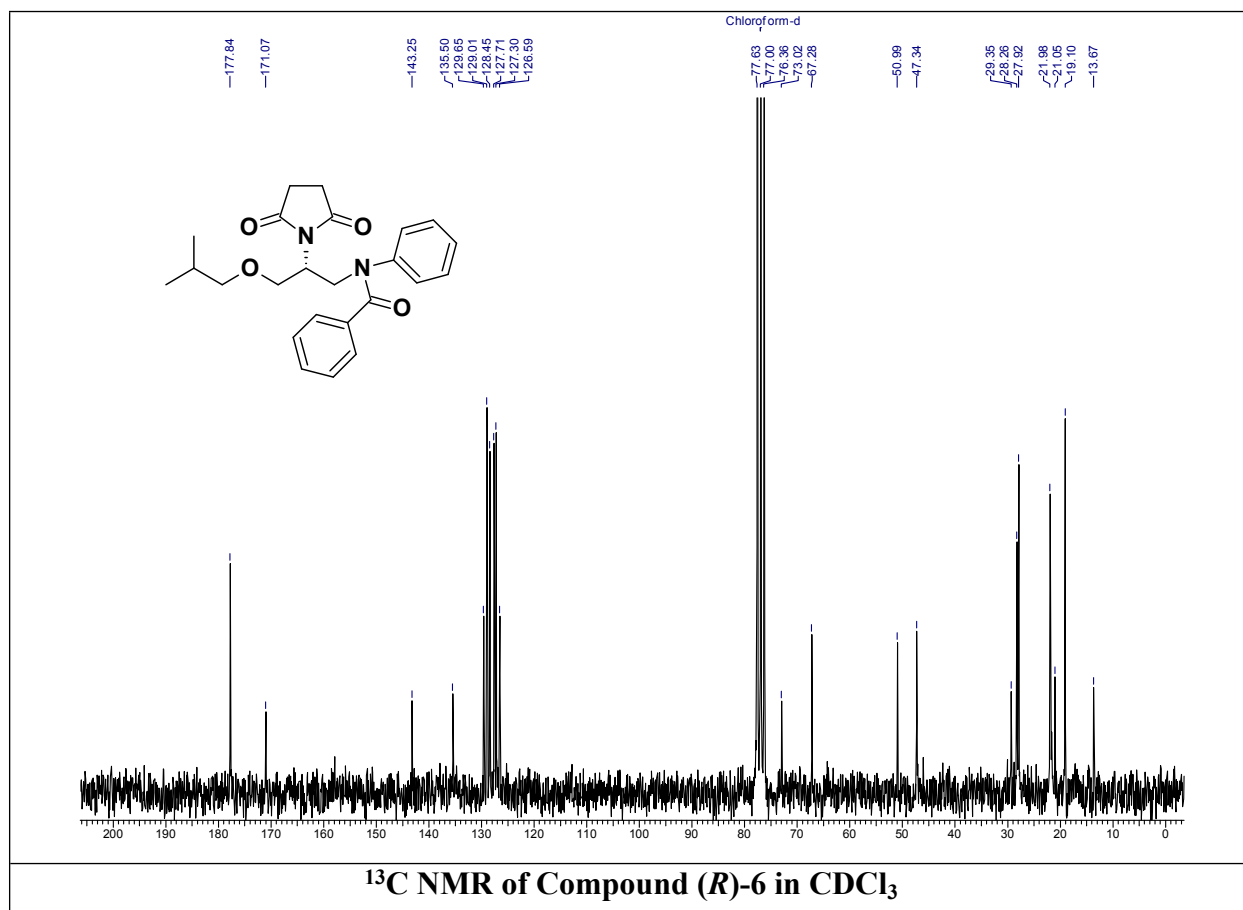



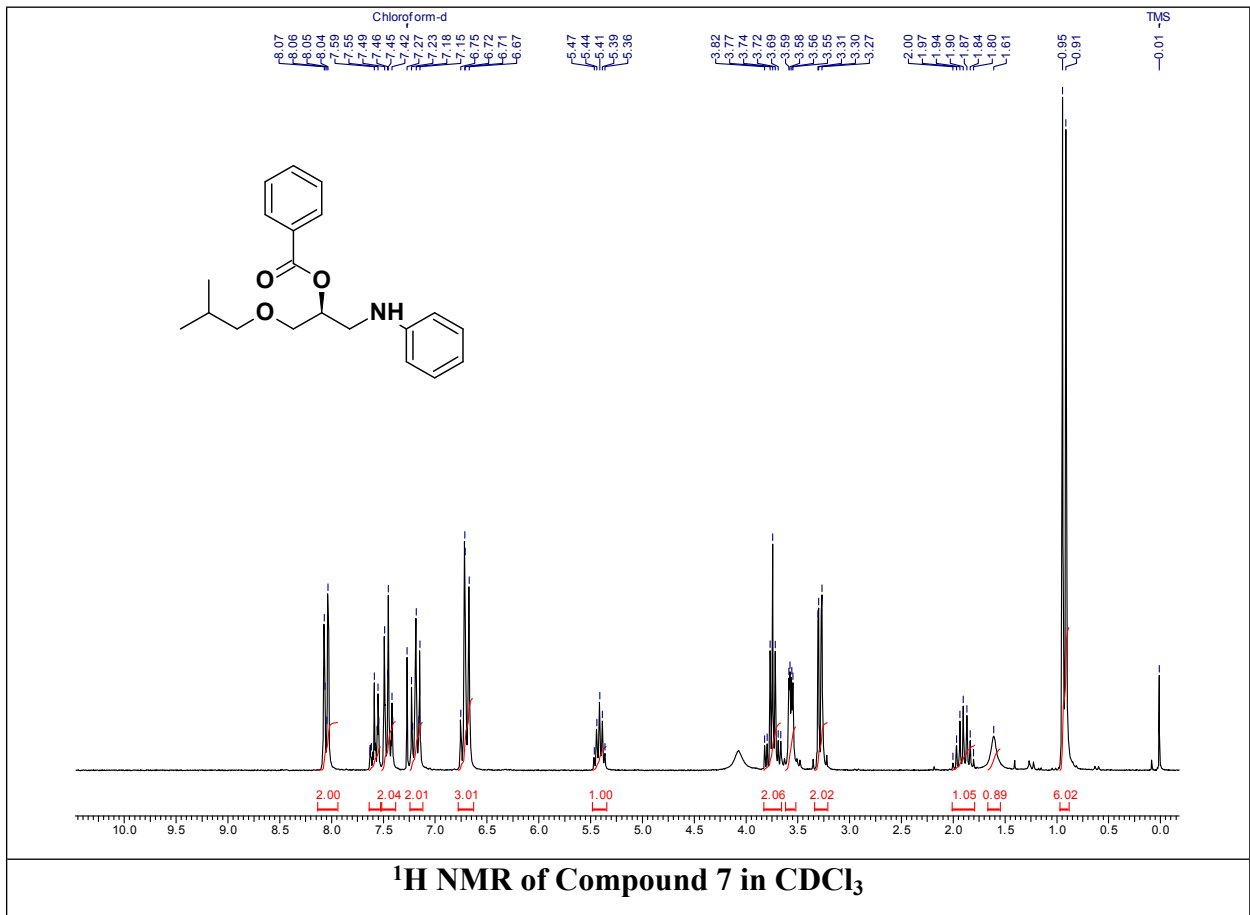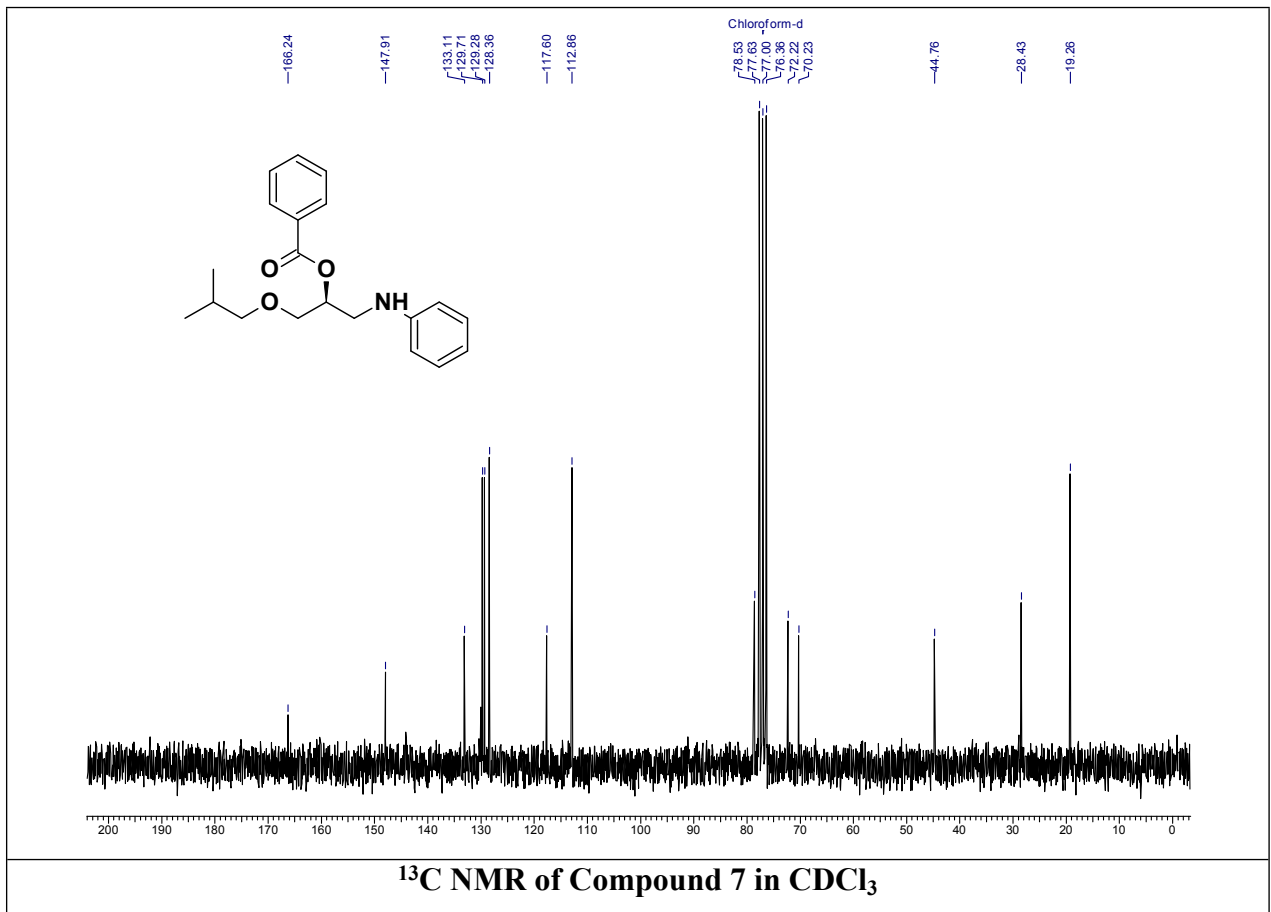

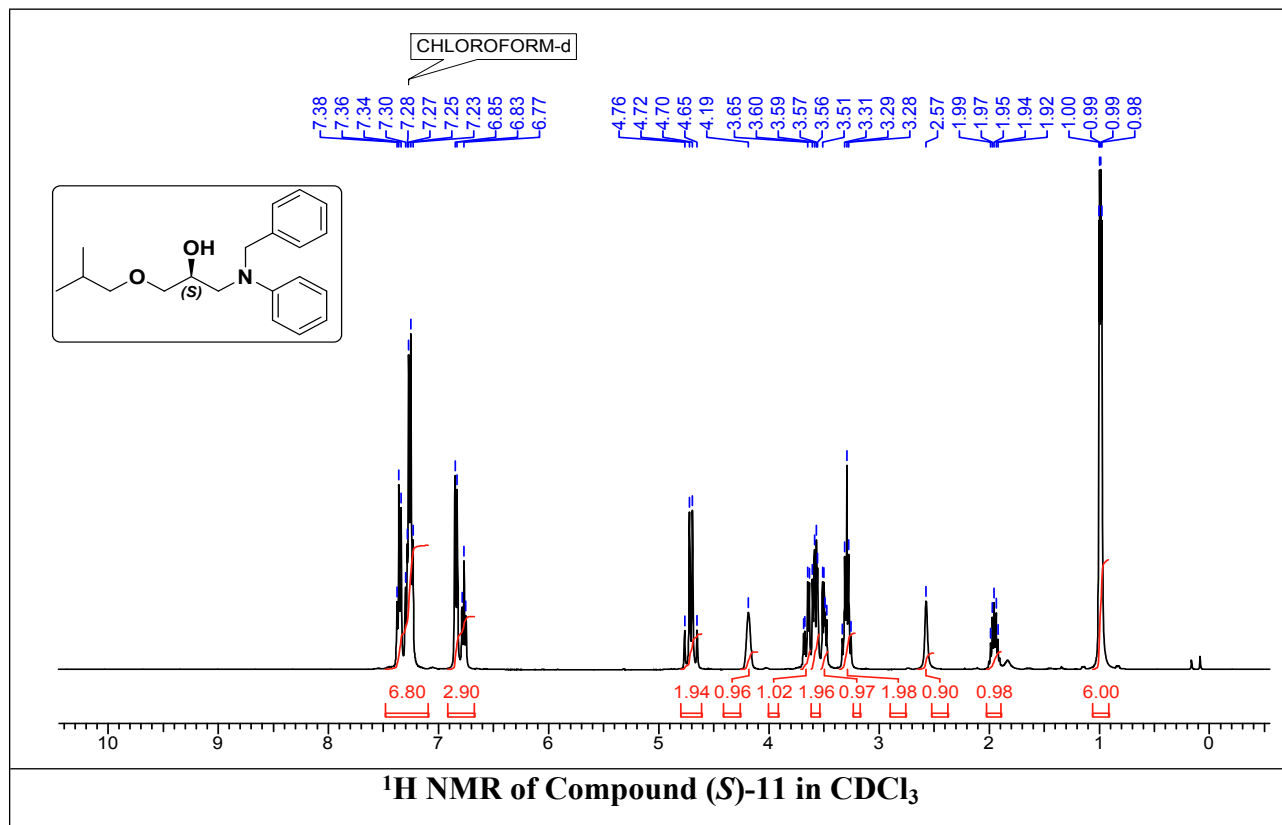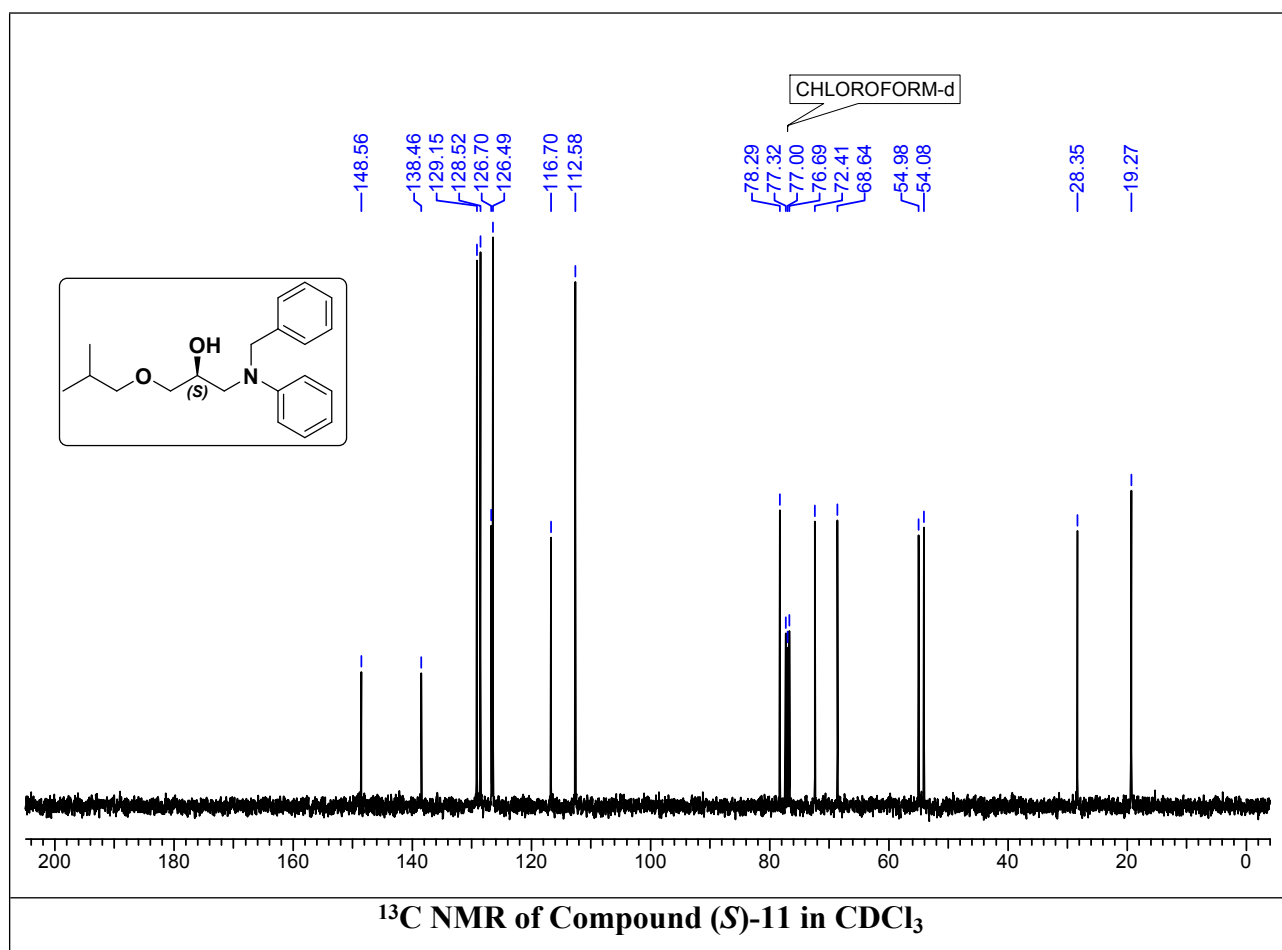

# HRMS of compound (S)-11

SJ-271 #145 RT: 0.64 AV: 1 NL: 1.06E10  
T: FTMS + p ESI/Full ms [100.00-1500.00]

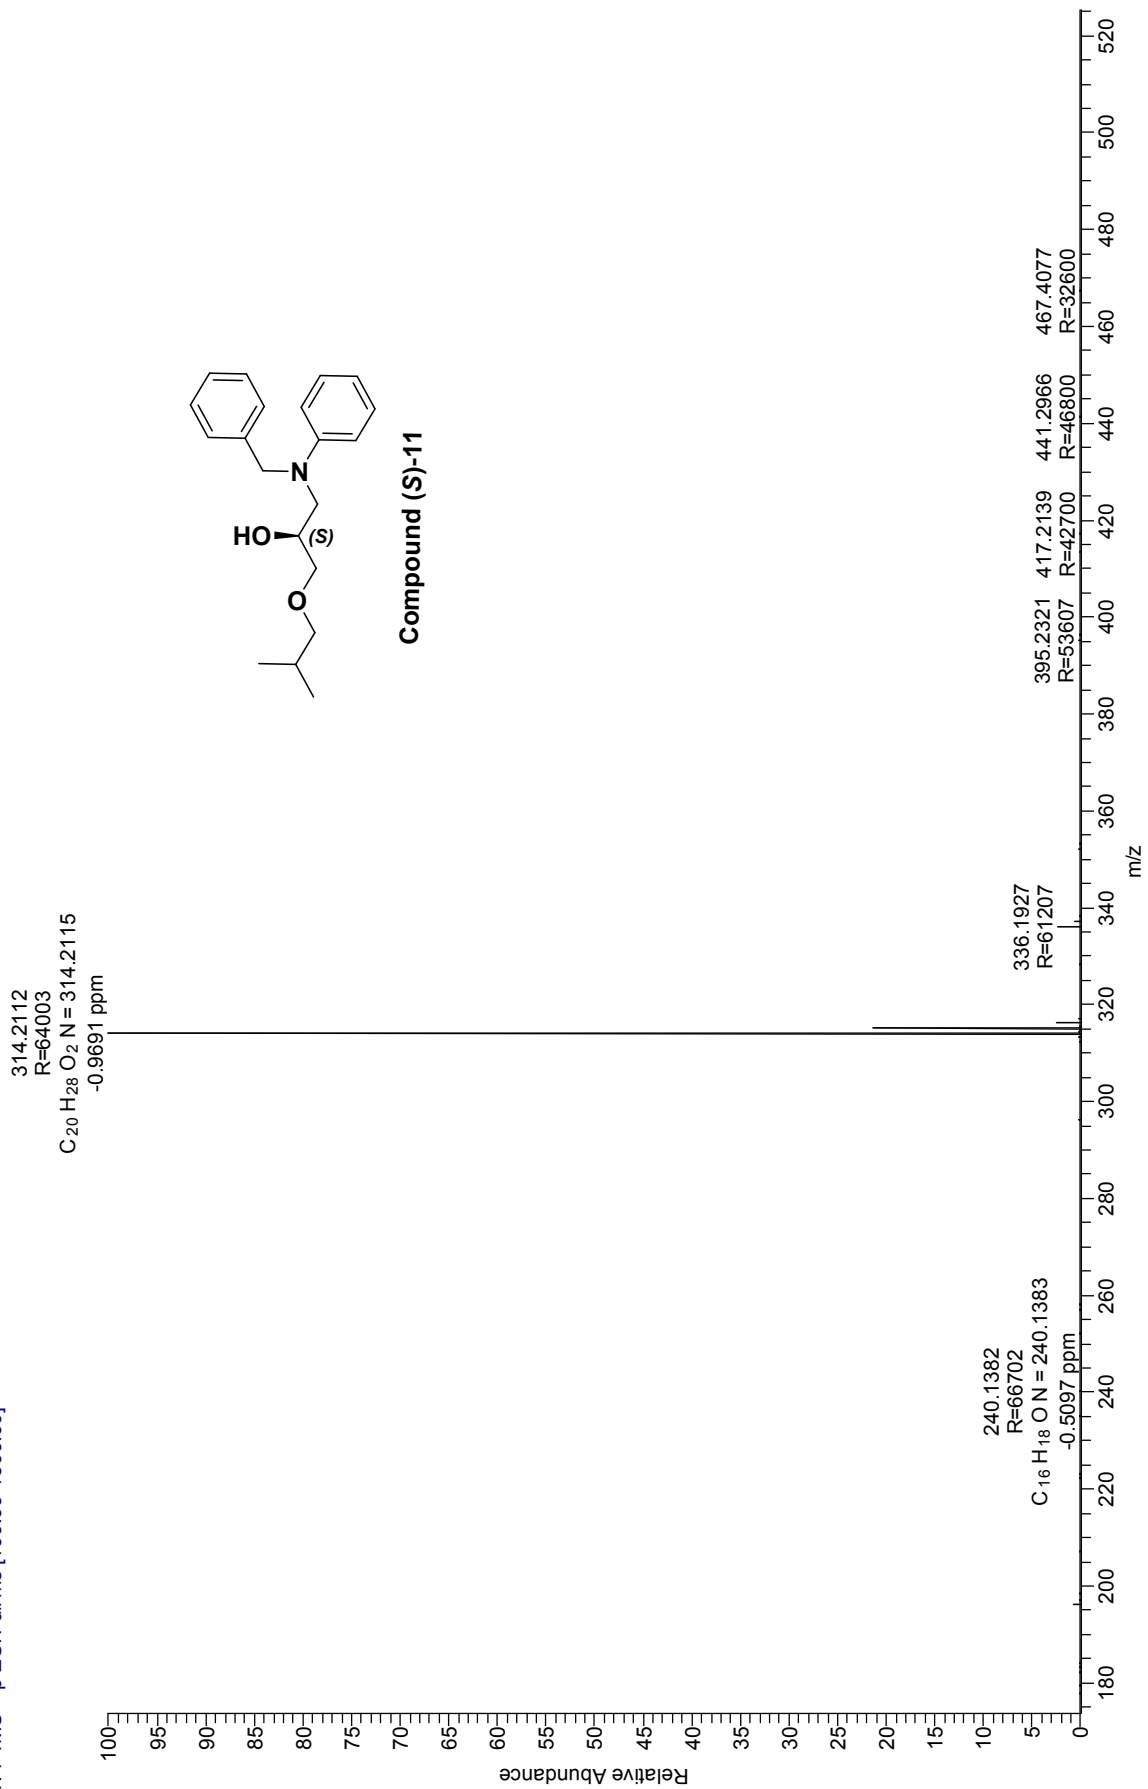

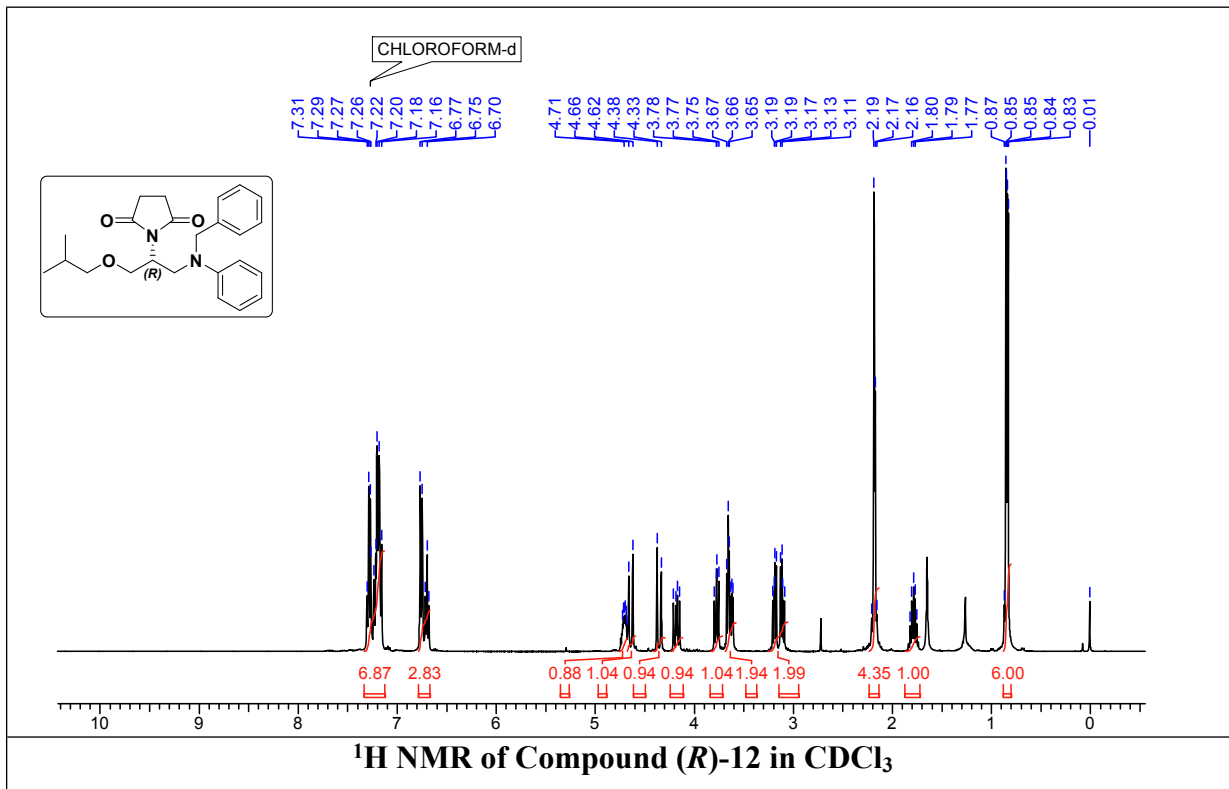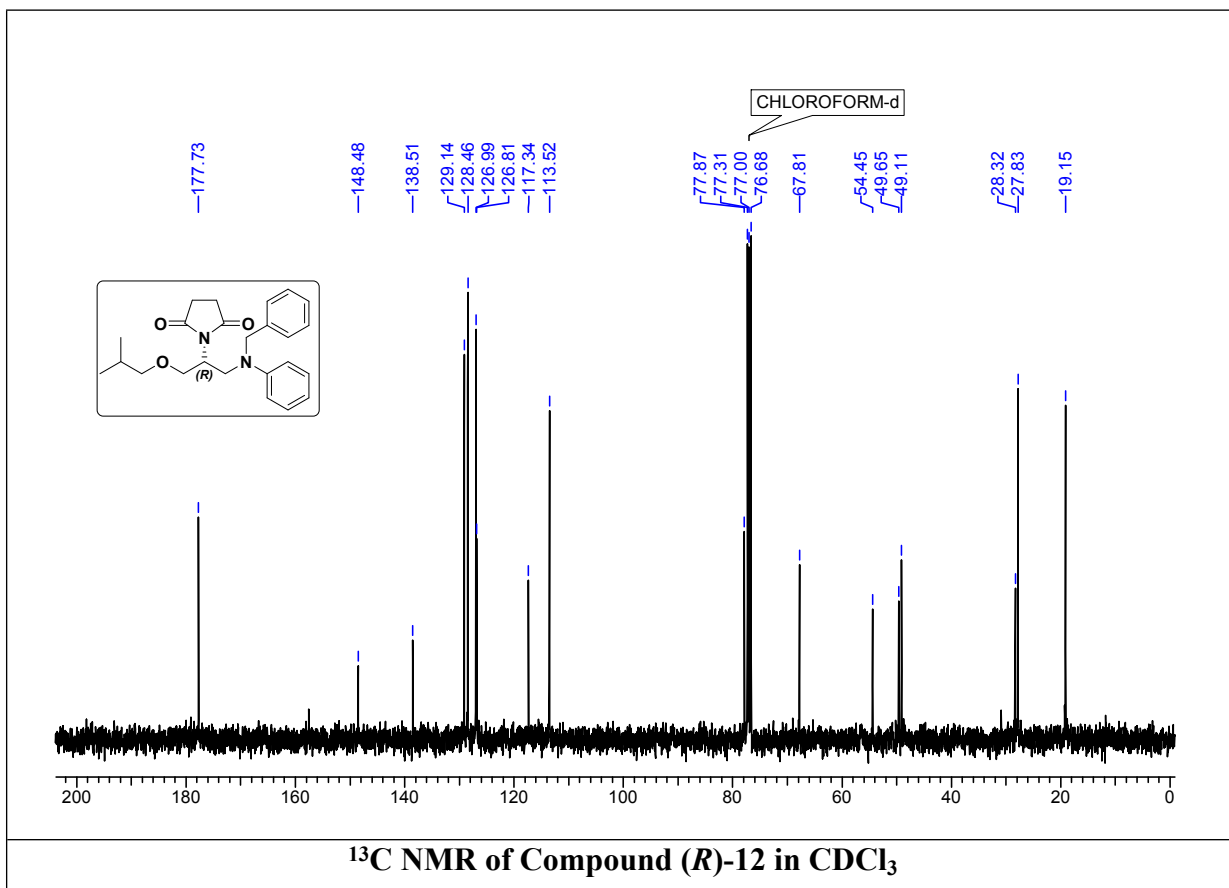

# HRMS of compound (R)-12

SJ-272 #141 RT: 0.63 AV: 1 NL: 9.65E9  
T: FTMS + p ESI/Full.ms [100.00-1500.00]

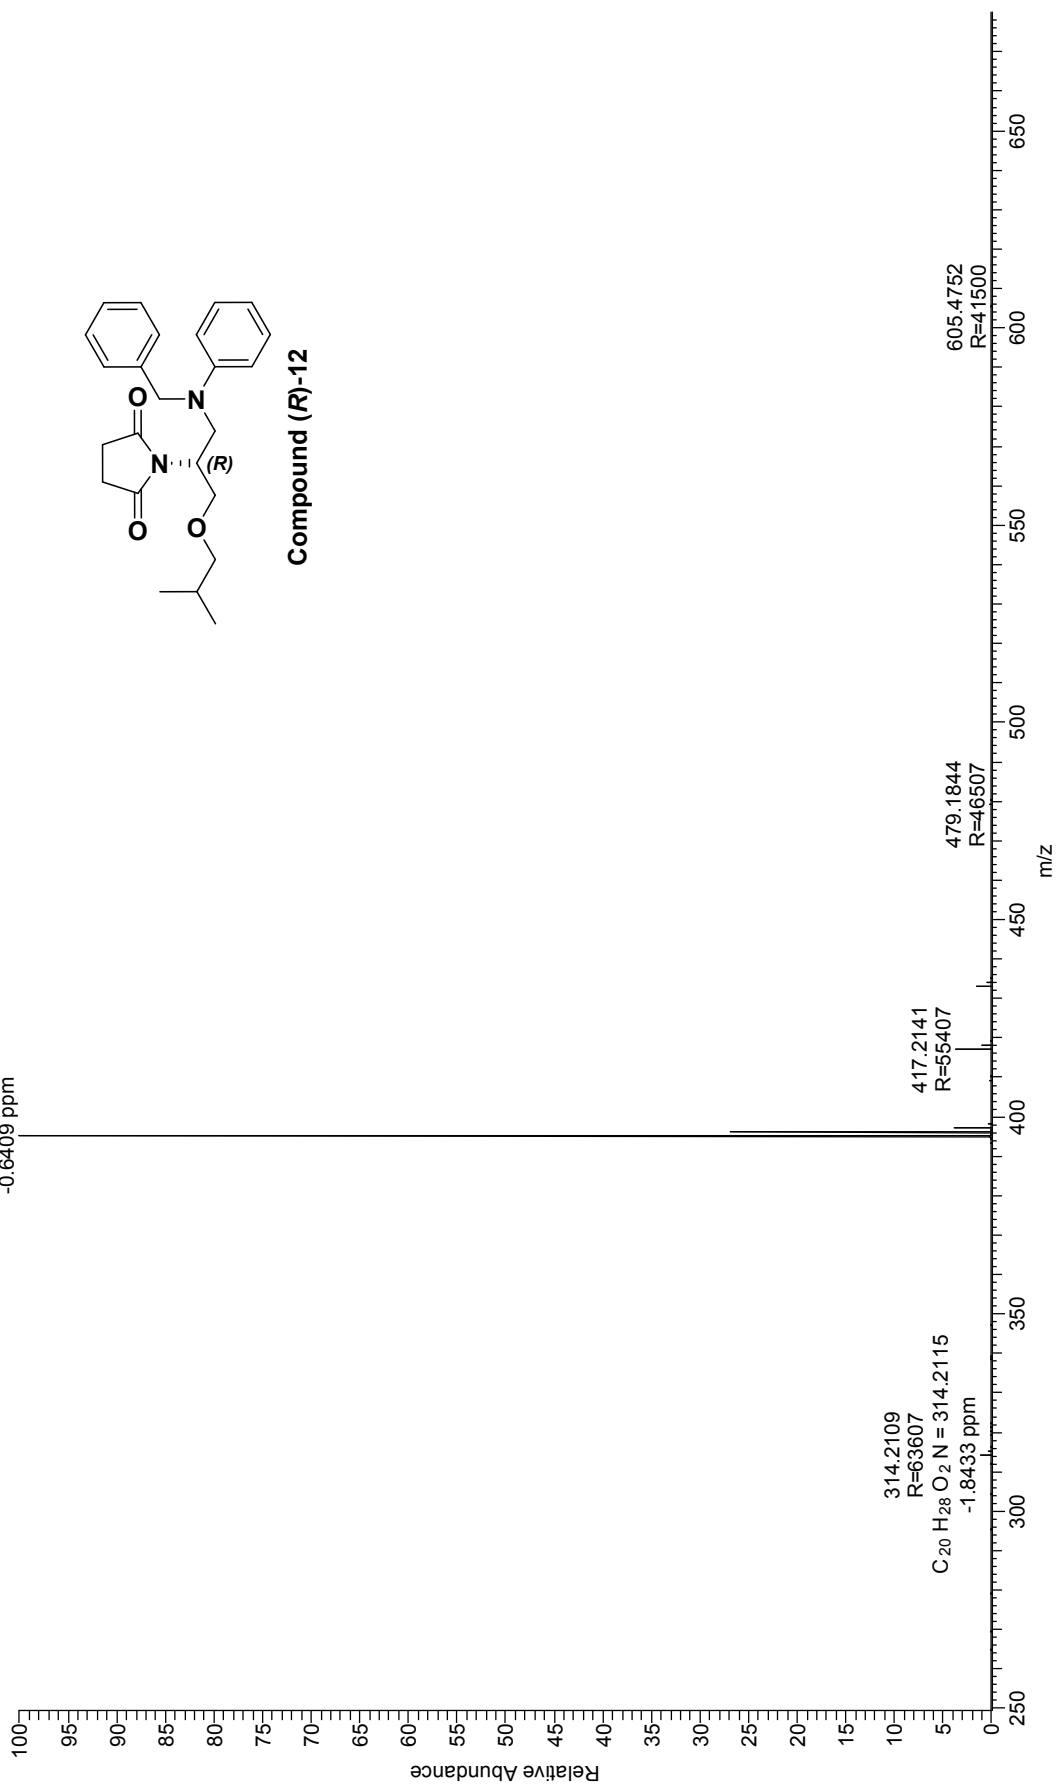

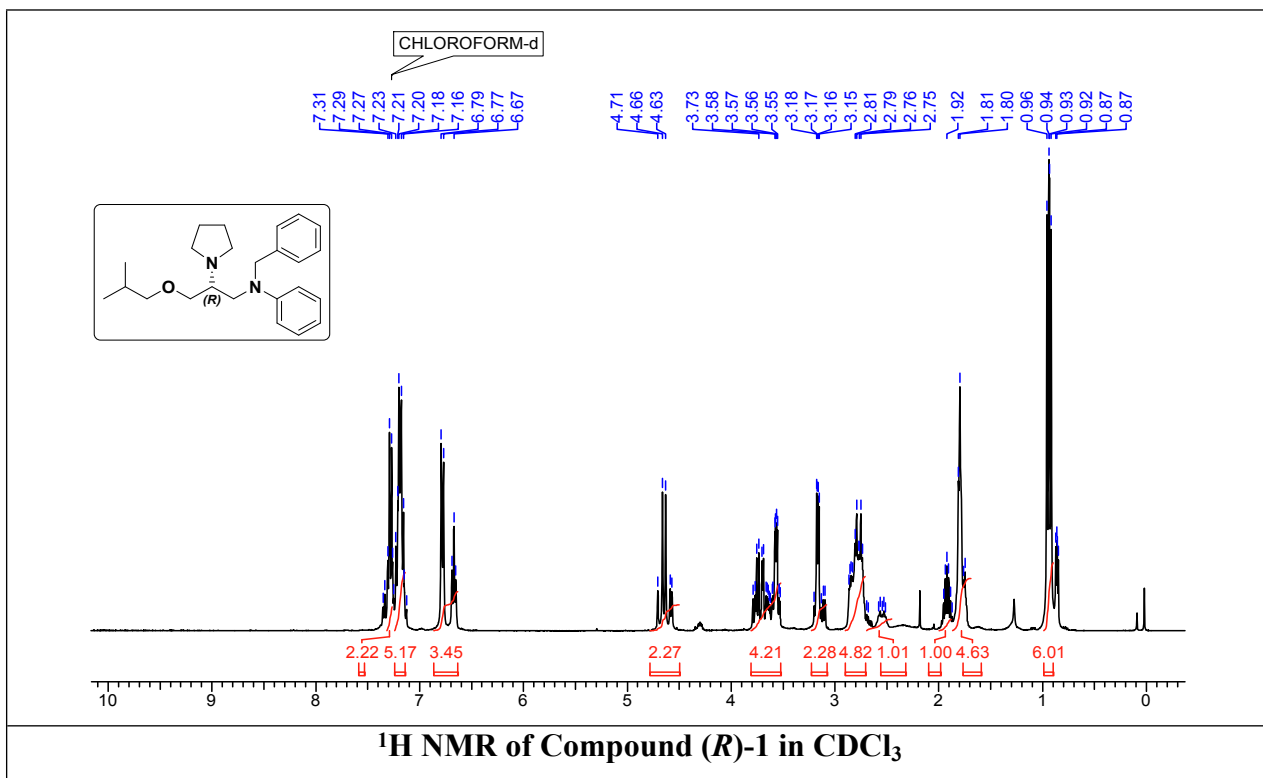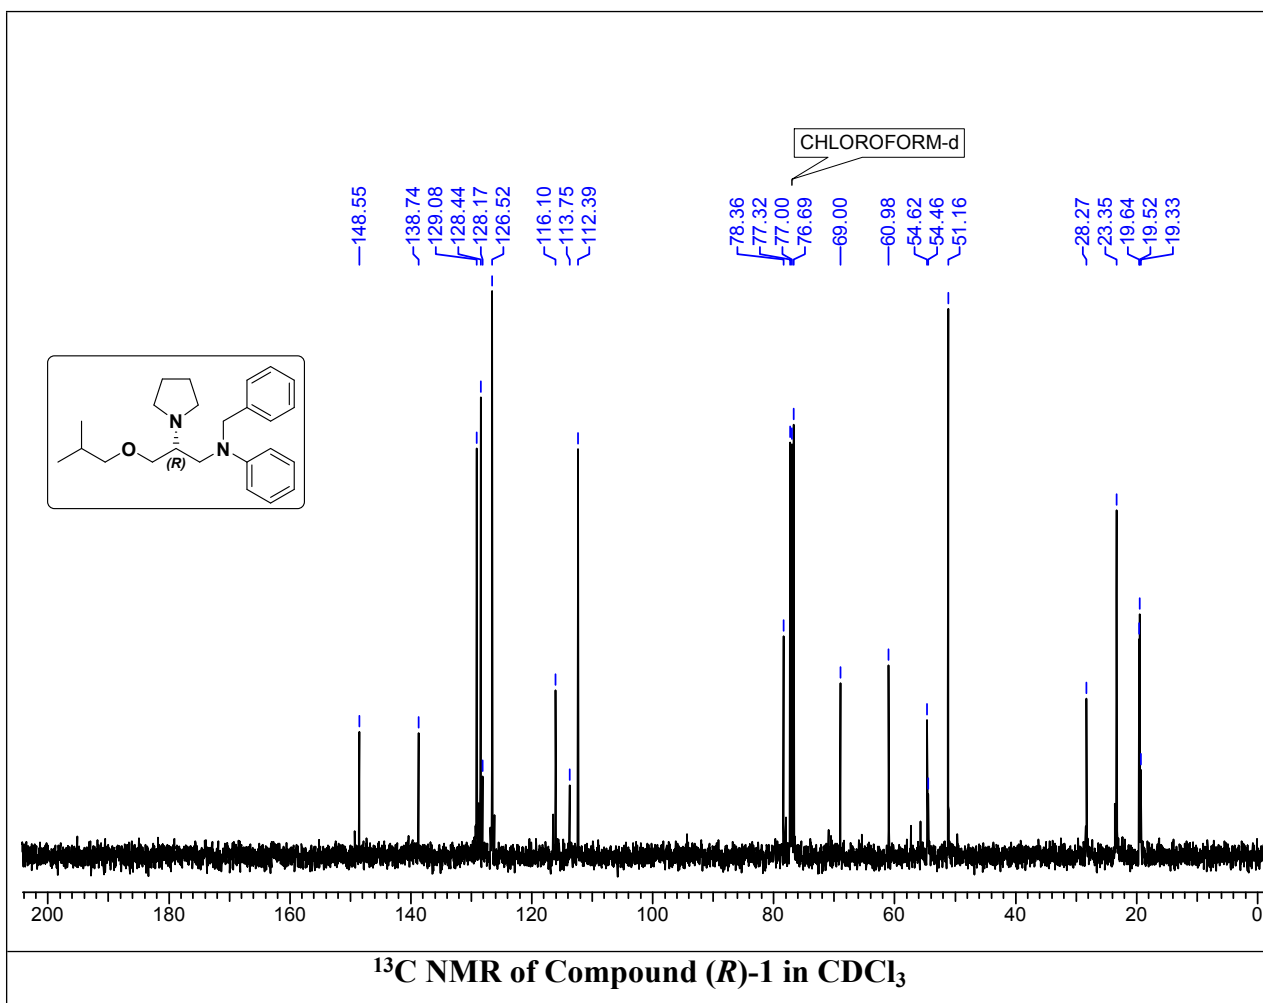

# HRMS of compound (R)-1

SJ-273 #88 RT: 0.39 AV: 1 NL: 4.66E9  
T: FTMS + pESI/Full.ms [100.00-1500.00]

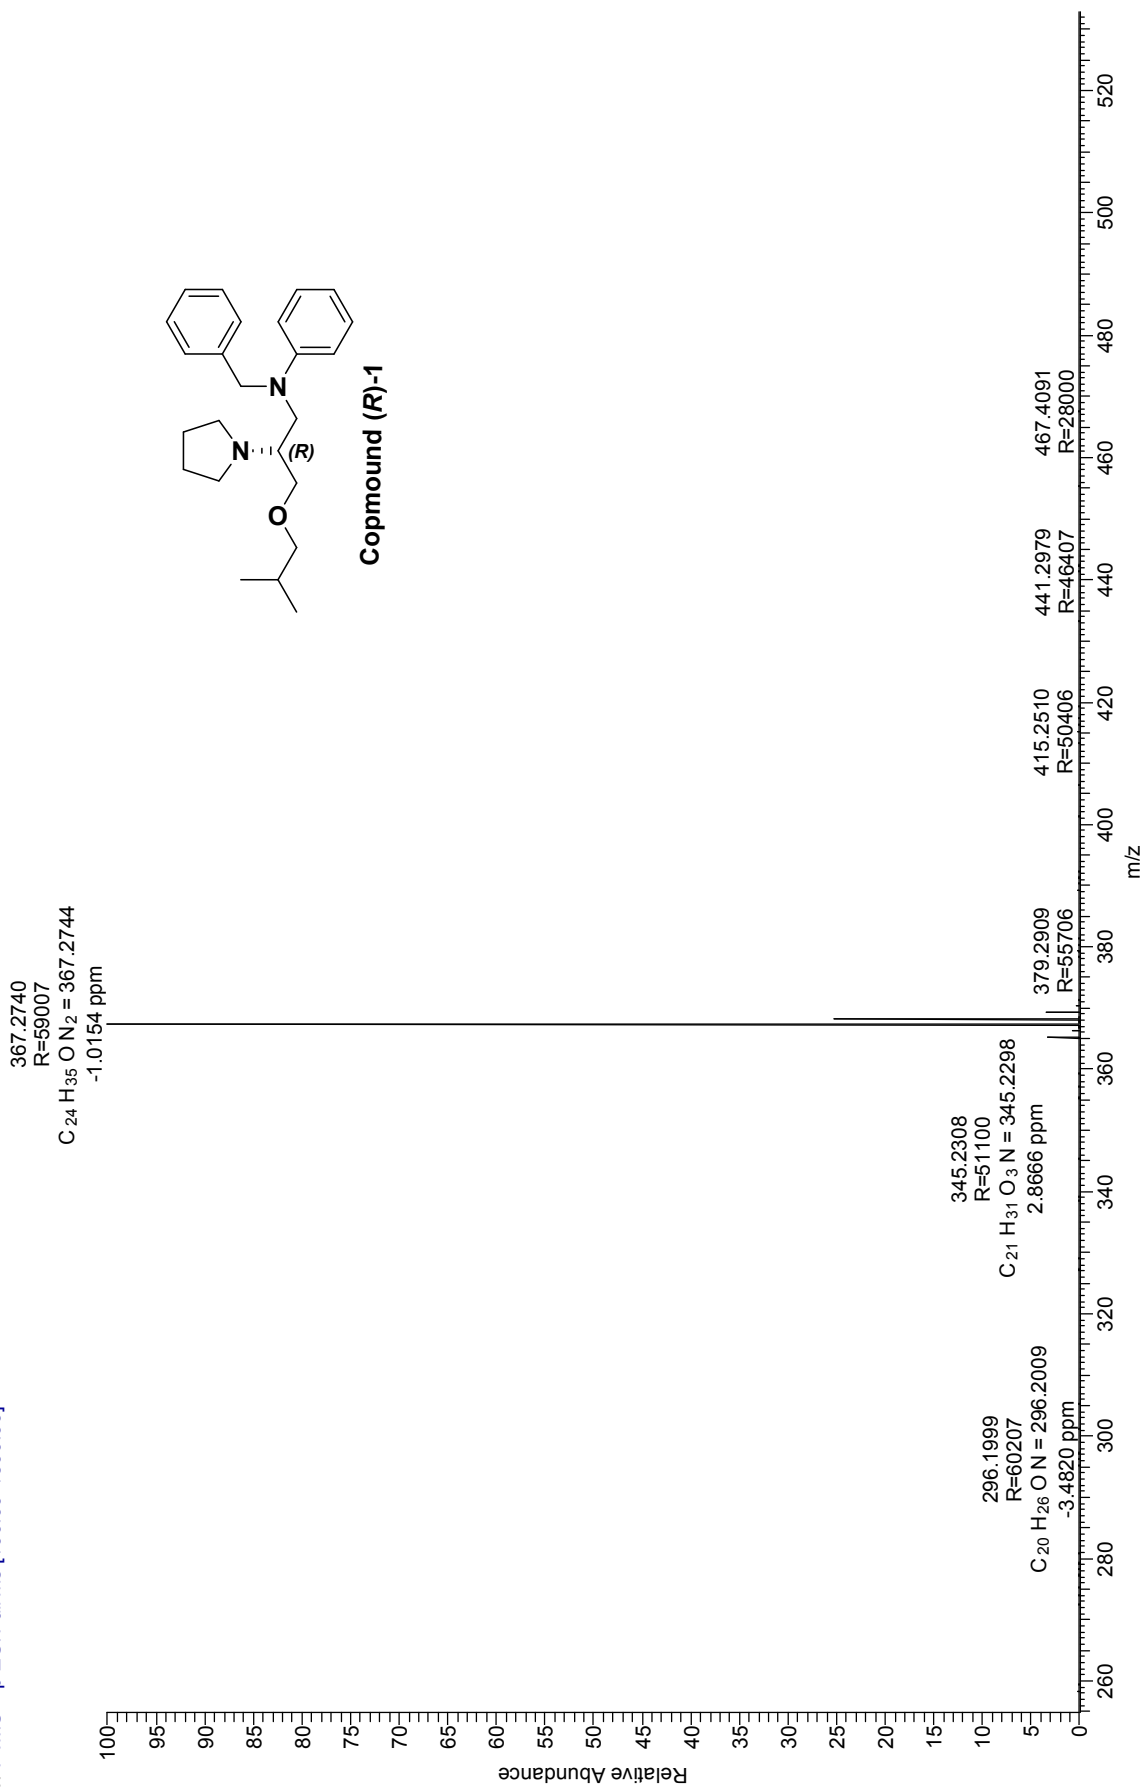

### Chiral HPLC Analysis of Compound 1 (racemic)

Conditions: Chiralcel OD-H (250 X 4.6 mm) column; eluent: Ethanol/n-Hexane/DEA (2:98:0.1); flow rate: 1 mL/min; detector 254 nm.

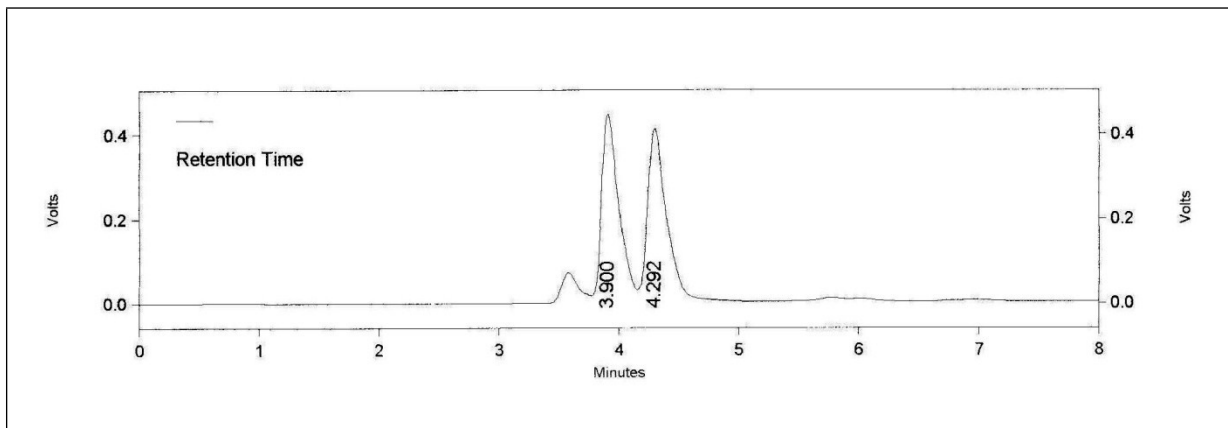

**Racemic Sample Chromatograph**

| Pk #          | Retention Time (mins) | Area           | Area %         |
|---------------|-----------------------|----------------|----------------|
| 1             | 3.900                 | 2045706        | 50.114         |
| 2             | 4.292                 | 2036406        | 49.886         |
| <b>Totals</b> |                       | <b>4082112</b> | <b>100.000</b> |

### Chiral HPLC Analysis of Compound (R)-1

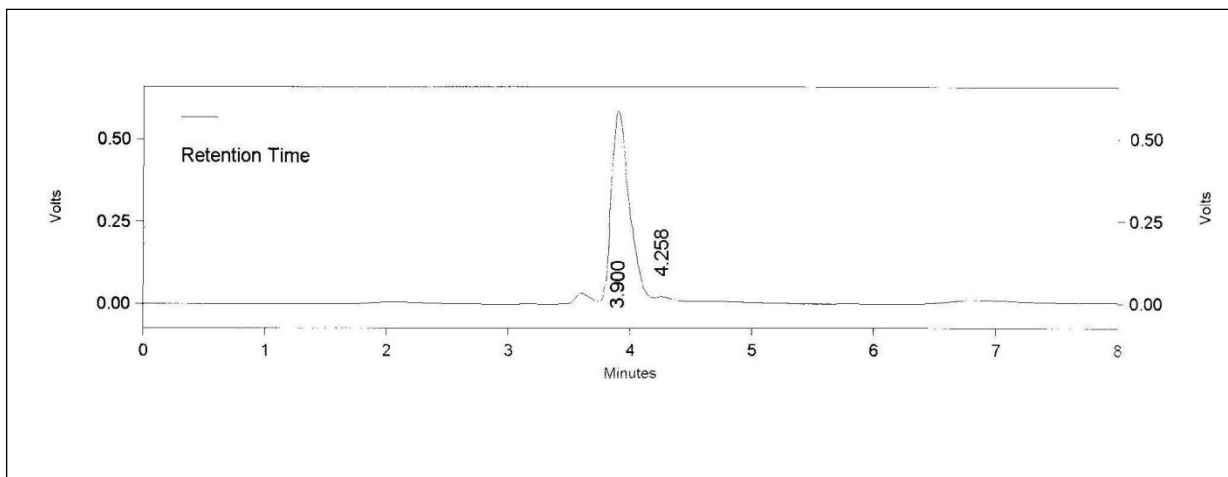

**Chiral -(R) Sample Chromatograph**

| Pk #          | Retention Time (mins) | Area           | Area %         |
|---------------|-----------------------|----------------|----------------|
| 1             | 3.900                 | 2848992        | 99.558         |
| 2             | 4.258                 | 12653          | 0.442          |
| <b>Totals</b> |                       | <b>2861645</b> | <b>100.000</b> |



## Chiral HPLC Analysis of Compound of (S)-1

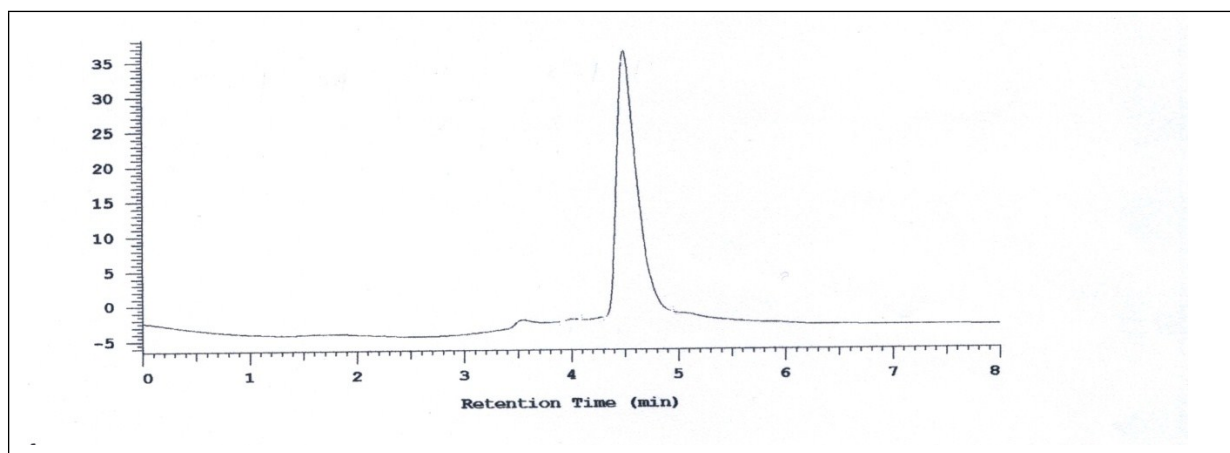

*Chiral -(S) Sample Chromatograph*

| <b>Pk #</b>   | <b>Retention Time (mins)</b> | <b>Area</b>   | <b>Area %</b>  |
|---------------|------------------------------|---------------|----------------|
| <b>1</b>      | <b>4.00</b>                  | <b>1304</b>   | <b>0.268</b>   |
| <b>2</b>      | <b>4.49</b>                  | <b>485825</b> | <b>99.732</b>  |
| <b>Totals</b> |                              | <b>487129</b> | <b>100.000</b> |
